# Supplementary material for: An agile, simplified and sonication mediated one-pot aqueous extraction and antibacterial assessment of predominant Korean mushrooms
Source: Royal Society of Chemistry journal article supplement (doi:10.1039/c5ra25514g), 2016-01-01
Supplement: c5ra25514g1.pdf [file c5ra25514g1.pdf]

# Fig. S1

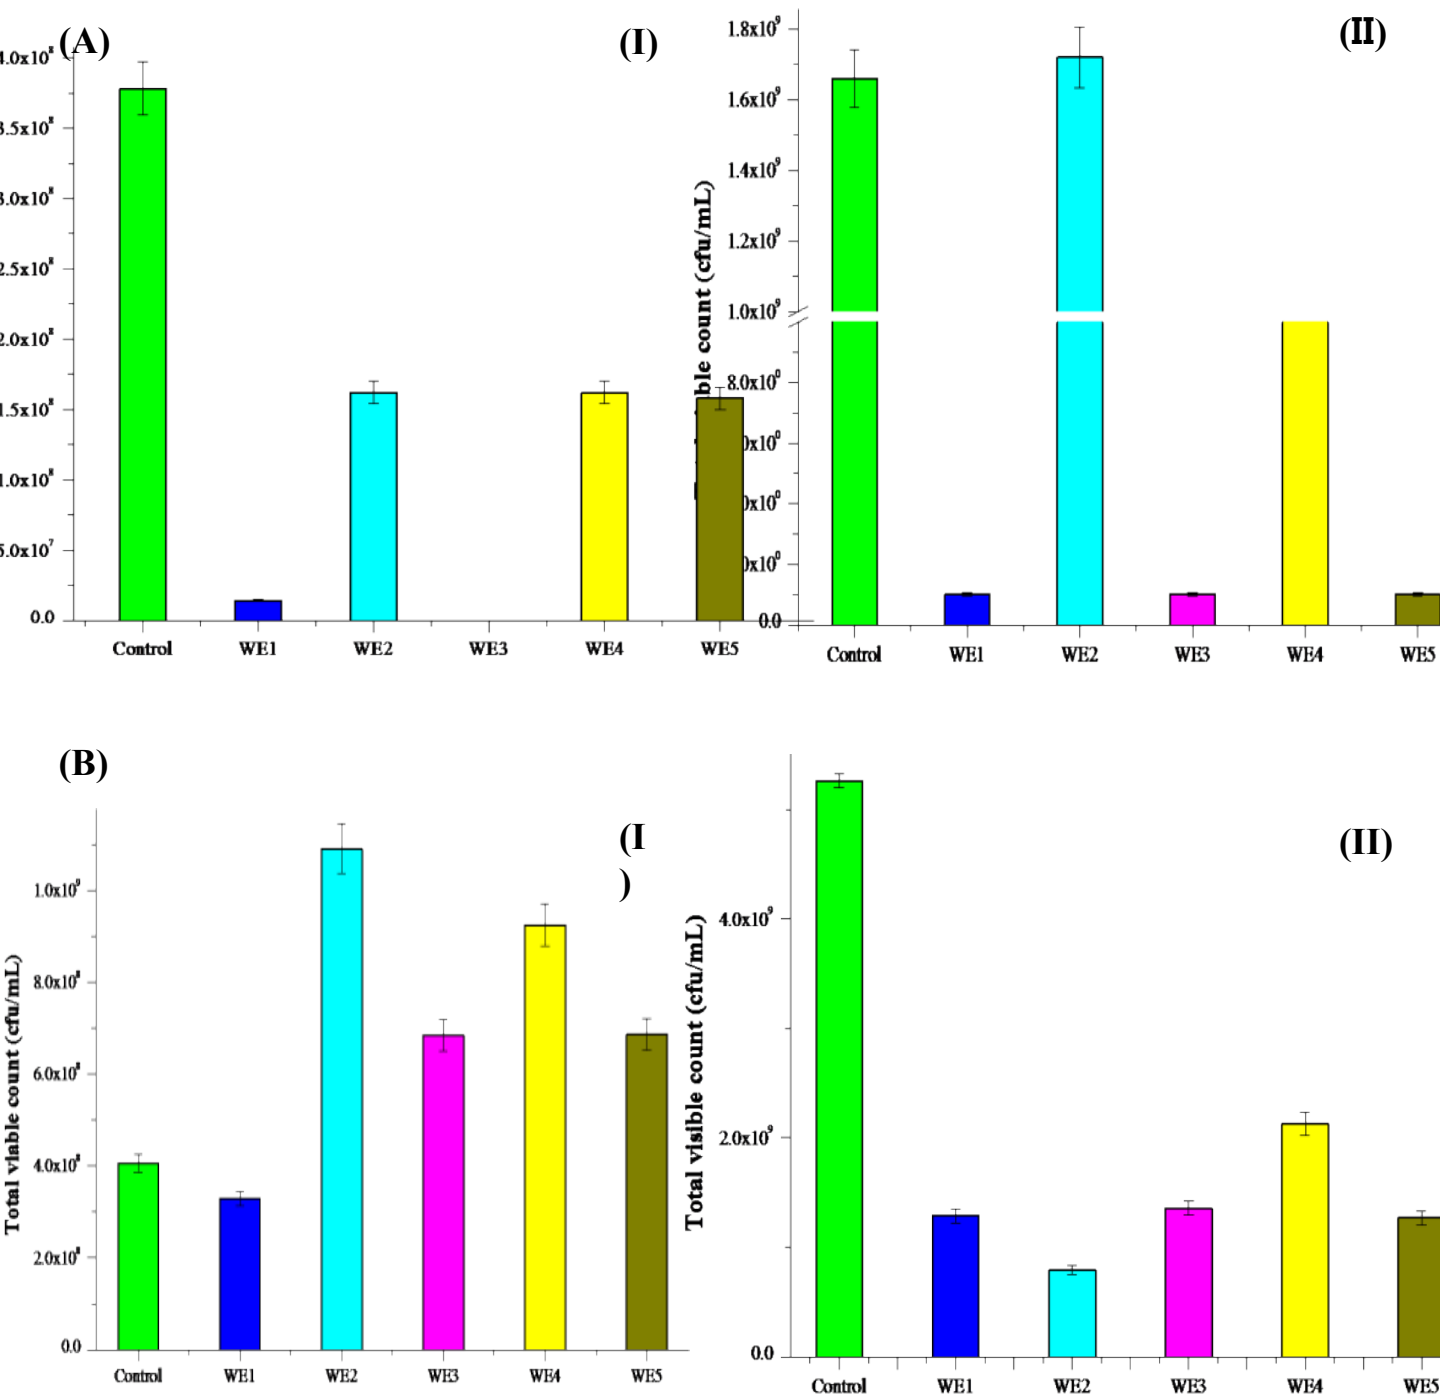

**Fig. S2**

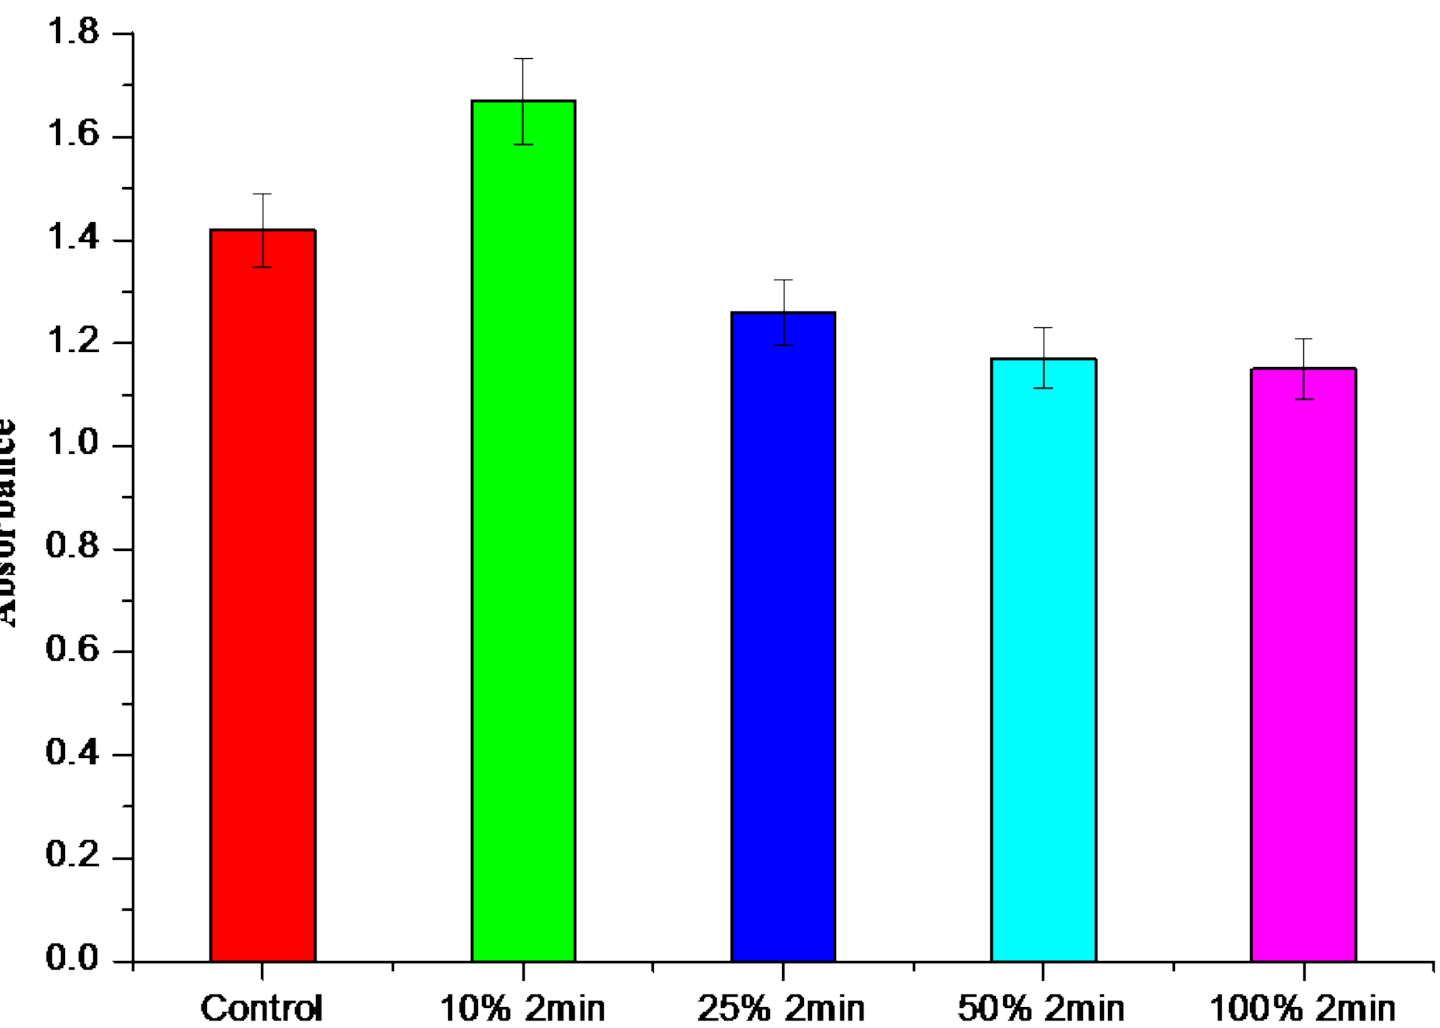

**Table S1****WE**

| Peak# | Ret.time | Area% | Name                                                                                                                             |
|-------|----------|-------|----------------------------------------------------------------------------------------------------------------------------------|
| 1     | 11.784   | 1.85  | Butane, 2,3-bis(trimethylsiloxy)-                                                                                                |
| 2     | 12.823   | 3.27  | Propanoic acid, 2-[(trimethylsilyl)oxy],trimethylsilyl ester                                                                     |
| 3     | 13.729   | 0.61  | l-Valine, trimethylsilyl ester                                                                                                   |
| 4     | 16.748   | 1.2   | l-Leucine, trimethylsilyl ester                                                                                                  |
| 5     | 17.332   | 0.73  | l-Proline, trimethylsilyl ester                                                                                                  |
| 6     | 17.517   | 1.24  | l-Isoleucine, trimethylsilyl ester                                                                                               |
| 7     | 21.407   | 5.67  | Trimethylsilyl ether of glycerol                                                                                                 |
| 8     | 21.794   | 1.66  | l-Threonine, O-(trimethylsilyl)-, trimethylsilyl ester                                                                           |
| 9     | 22.394   | 8.09  | Butanedioic acid, bis(trimethylsilyl) ester                                                                                      |
| 10    | 28.071   | 0.95  | Butane, 1,2,3,4-tetrakis[(trimethylsilyl)oxy]-                                                                                   |
| 11    | 28.49    | 0.39  | Alanine, phenyl-, trimethylsilyl ester, dl-                                                                                      |
| 12    | 31.463   | 1.11  | D-Arabinose, tetrakis(trimethylsilyl)-                                                                                           |
| 13    | 32.372   | 0.49  | Xylulose tetrakis(trimethylsilyl)-                                                                                               |
| 14    | 33.131   | 16.38 | Xylitol, 1,2,3,4,5-pentakis-O-(trimethylsilyl)-                                                                                  |
| 15    | 35.184   | 0.51  | D-Fructose, 1,3,4,5,6-pentakis-O-(trimethylsilyl)-                                                                               |
| 16    | 35.357   | 0.33  | D-Ribo-Hexitol, 3-deoxy-1,2,4,5,6-pentakis-O (trimethylsilyl)-                                                                   |
| 17    | 35.76    | 0.5   | .beta.-D-Galactofuranose, 1,2,3,5,6-pentakis-O-(trimethylsilyl)-                                                                 |
| 18    | 36.727   | 13.19 | .alpha.-D-Glucopyranose, 1,2,3,4,6-pentakis-O-(trimethylsilyl)-                                                                  |
| 19    | 36.954   | 0.79  | Glucopyranose, pentakis-O-trimethylsilyl-                                                                                        |
| 20    | 37.506   | 14.27 | Trimethylsilyl ether of glucitol                                                                                                 |
| 21    | 38.523   | 15.52 | D-Glucose, 2,3,4,5,6-pentakis-O-(trimethylsilyl)-                                                                                |
| 22    | 40.593   | 2.51  | D-Glucopyranose, 2-(acetylamino)-2-deoxy-1,3,4,6-tetrakis-O-(trimethylsilyl)-                                                    |
| 23    | 46.3     | 1.16  | Uridine, 2',3',5'-tris-O-(trimethylsilyl)-                                                                                       |
| 24    | 49.739   | 7.58  | .alpha.-D-Glucopyranoside, 1,3,4,6-tetrakis-O-(trimethylsilyl)-<br>.beta.-D-fructofuranosyl 2,3,4,6-tetrakis-O-(trimethylsilyl)- |

**Table S2****WEBS**

| Peak# | Ret.time | Area% | Name                                                                                                                        |
|-------|----------|-------|-----------------------------------------------------------------------------------------------------------------------------|
| 1     | 12.763   | 0.23  | Propanoic acid, 2-[(trimethylsilyl)oxy],trimethylsilyl ester                                                                |
| 2     | 13.707   | 0.81  | l-Valine, trimethylsilyl ester                                                                                              |
| 3     | 14.703   | 1.14  | l-Alanine, N-(trimethylsilyl)-, trimethylsilyl ester                                                                        |
| 4     | 15.431   | 0.33  | Glycine, N-(trimethylsilyl)-, trimethylsilyl ester                                                                          |
| 5     | 16.715   | 1.37  | l-Leucine, trimethylsilyl ester                                                                                             |
| 6     | 17.311   | 0.85  | l-Proline, trimethylsilyl ester                                                                                             |
| 7     | 17.486   | 0.72  | l-Isoleucine, trimethylsilyl ester                                                                                          |
| 8     | 19.189   | 3.75  | L-Valine, N-(trimethylsilyl)-, trimethylsilyl ester                                                                         |
| 9     | 22.329   | 0.73  | Butanedioic acid, bis(trimethylsilyl) ester                                                                                 |
| 10    | 23.312   | 0.49  | 2-Butenedioic acid (E)-, bis(trimethylsilyl) ester                                                                          |
| 11    | 23.938   | 0.55  | Serine tritms                                                                                                               |
| 12    | 24.71    | 1.38  | N,O,O-Tris(trimethylsilyl)-L-threonine                                                                                      |
| 13    | 27.397   | 1.88  | DL-Malic acid, O-trimethylsilyl-, bis(trimethylsilyl) ester                                                                 |
| 14    | 28.071   | 1.6   | Butane, 1,2,3,4-tetrakis[(trimethylsilyl)oxy]-                                                                              |
| 15    | 28.5     | 1.73  | Alanine, phenyl-, trimethylsilyl ester, dl-                                                                                 |
| 16    | 30.564   | 1.25  | N,O-Bis-(trimethylsilyl)phenylalanine                                                                                       |
| 17    | 31.455   | 0.69  | D-Arabinose, tetrakis(trimethylsilyl)-                                                                                      |
| 18    | 33.133   | 10.5  | Xylitol, 1,2,3,4,5-pentakis-O-(trimethylsilyl)-                                                                             |
| 19    | 33.925   | 1.92  | Phosphoric acid, bis(trimethylsilyl) 2,3-bis[(trimethylsilyl)oxy]propyl ester                                               |
| 20    | 35.087   | 2.25  | 2-Keto-d-gluconic acid, pentakis(O-trimethylsilyl)-                                                                         |
| 21    | 35.19    | 3.12  | D-Fructose, 1,3,4,5,6-pentakis-O-(trimethylsilyl)-                                                                          |
| 22    | 35.359   | 0.53  | D-Ribo-Hexitol, 3-deoxy-1,2,4,5,6-pentakis-O-(trimethylsilyl)-                                                              |
| 23    | 36.112   | 3.1   | Tyrosine, O-trimethylsilyl-, trimethylsilyl ester                                                                           |
| 24    | 36.723   | 15.86 | .alpha.-D-Glucopyranose, 1,2,3,4,6-pentakis-O-(trimethylsilyl)-                                                             |
| 25    | 36.951   | 0.76  | D-Glucose, 2,3,4,5,6-pentakis-O-(trimethylsilyl)-                                                                           |
| 26    | 37.516   | 12.85 | Trimethylsilyl ether of glucitol                                                                                            |
| 27    | 38.523   | 20.21 | Glucopyranose, pentakis-O-trimethylsilyl-                                                                                   |
| 28    | 39.059   | 0.5   | Hexadecanoic acid, trimethylsilyl ester                                                                                     |
| 29    | 40.578   | 1.72  | D-Glucopyranose, 2-(acetylamino)-2-deoxy-1,3,4,6-tetrakis-O-(trimethylsilyl)-                                               |
| 30    | 42.016   | 0.84  | 9,12-Octadecadienoic acid (Z,Z)-, trimethylsilyl ester                                                                      |
| 31    | 42.133   | 0.86  | Tryptophan, bis(trimethylsilyl)-                                                                                            |
| 32    | 46.318   | 3.62  | Uridine, 2',3',5'-tris-O-(trimethylsilyl)-                                                                                  |
| 33    | 48.246   | 0.29  | Hexadecanoic acid, 2,3-bis[(trimethylsilyl)oxy]propyl ester                                                                 |
| 34    | 49.722   | 1.57  | alpha.-D-Glucopyranoside, 1,3,4,6-tetrakis-O-(trimethylsilyl)-.beta.-D-fructofuranosyl 2,3,4,6-tetrakis-O-(trimethylsilyl)- |

**Table S3****WEPUS**

| Peak# | Ret.time | Area% | Name                                                                          |
|-------|----------|-------|-------------------------------------------------------------------------------|
| 1     | 21.388   | 5.53  | Trimethylsilyl ether of glycerol                                              |
| 2     | 22.333   | 2.77  | Butanedioic acid, bis(trimethylsilyl) ester                                   |
| 3     | 23.311   | 1.91  | 2-Butenedioic acid (E)-, bis(trimethylsilyl) ester                            |
| 4     | 25.929   | 3.11  | (R*,S*)-3,4-Dihydroxybutanoic acid triTMS                                     |
| 5     | 27.398   | 6.38  | DL-Malic acid, O-trimethylsilyl<br>, bis(trimethylsilyl) ester                |
| 6     | 28.063   | 0.76  | Butane, 1,2,3,4-tetrakis[(trimethylsilyl)oxy]-                                |
| 7     | 30.254   | 0.39  | D-Erythro-Pentitol, 2-deoxy-1,3,4,5-tetrakis-O-(trimethylsilyl)-              |
| 8     | 31.451   | 1.2   | D-Arabinose, tetrakis(trimethylsilyl)-                                        |
| 9     | 31.745   | 0.37  | D-Ribose, 2,3,4,5-tetrakis-O-(trimethylsilyl)-                                |
| 10    | 31.919   | 0.66  | Mannose, 6-deoxy-2,3,4,5-tetrakis-O-(trimethylsilyl)-, L-                     |
| 11    | 33.133   | 17.4  | Xylitol, 1,2,3,4,5-pentakis-O-(trimethylsilyl)-                               |
| 12    | 34.355   | 0.21  | D-Glucitol, 6-deoxy-1,2,3,4,5-pentakis-O-(trimethylsilyl)-                    |
| 13    | 35.349   | 0.79  | D-Ribo-Hexitol, 3-deoxy-1,2,4,5,6-pentakis-O-(trimethylsilyl)-                |
| 14    | 35.749   | 1.15  | .beta.-D-Galactofuranose, 1,2,3,5,6-pentakis-O-(trimethylsilyl)-              |
| 15    | 36.043   | 1.44  | D-Xylose, tetrakis(trimethylsilyl)-                                           |
| 16    | 36.718   | 20.73 | .alpha.-D-Glucopyranose, 1,2,3,4,6-pentakis-O-(trimethylsilyl)-               |
| 17    | 36.939   | 2.8   | D-Glucose, 2,3,4,5,6-pentakis-O-(trimethylsilyl)-                             |
| 18    | 38.522   | 26.72 | Glucopyranose, pentakis-O-trimethylsilyl-                                     |
| 19    | 40.467   | 0.36  | Inositol, 1,2,3,4,5,6-hexakis-O-(trimethylsilyl)-, scyllo-                    |
| 20    | 40.573   | 2.35  | D-Glucopyranose, 2-(acetylamino)-2-deoxy-1,3,4,6-tetrakis-O-(trimethylsilyl)- |
| 21    | 40.712   | 0.85  | Galactose, 2-(acetylamino)-2-deoxy-3,4,5,6-tetrakis-O-(trimethylsilyl)-       |
| 22    | 46.293   | 1.93  | Uridine, 2',3',5'-tris-O-(trimethylsilyl)-                                    |
| 23    | 48.245   | 0.19  | Hexadecanoic acid, 2,3-bis[(trimethylsilyl)oxy]propyl ester                   |

**Table S4**

| Peak# | Ret.time | Area% | Name                                                          |
|-------|----------|-------|---------------------------------------------------------------|
| 1     | 13.556   | 80.11 | Butanoic acid, 2-[(trimethylsilyl)oxy]-, trimethylsilyl ester |
| 2     | 35.190   | 1.30  | Tetradecanoic acid, trimethylsilyl ester                      |
| 3     | 39.035   | 1.81  | Hexadecanoic acid, trimethylsilyl ester                       |
| 4     | 42.562   | 1.64  | Octadecanoic acid, trimethylsilyl ester                       |
| 5     | 47.498   | 9.09  | 1,2-Benzenedicarboxylic acid, diisooctyl ester                |
| 6     | 48.253   | 2.94  | Hexadecanoic acid, 2,3-bis[(trimethylsilyl)oxy] propyl ester  |
| 7     | 51.032   | 3.11  | Octadecanoic acid, 2,3-bis[(trimethylsilyl)oxy]propyl ester   |

**Table S5**

| Peak# | Ret.time | Area% | Name                                                                                                                         |
|-------|----------|-------|------------------------------------------------------------------------------------------------------------------------------|
| 1     | 11.856   | 33.64 | Butane, 2,3-bis(trimethylsiloxy)-                                                                                            |
| 2     | 13.681   | 57.68 | Butanoic acid, 2-[(trimethylsilyl)oxy]-, trimethylsilyl ester                                                                |
| 3     | 31.294   | 0.33  | 1-Tridecanol, tert-butyldimethylsilyl ether                                                                                  |
| 4     | 37.506   | 1.10  | D-Mannitol, 1,2,3,4,5,6-hexakis-O-(trimethylsilyl)-                                                                          |
| 5     | 38.499   | 0.90  | Glucopyranose, pentakis-O-trimethylsilyl-                                                                                    |
| 6     | 39.047   | 0.83  | Hexadecanoic acid, trimethylsilyl ester                                                                                      |
| 7     | 42.034   | 1.24  | 9,12-Octadecadienoic acid (Z,Z)-, trimethylsilyl ester                                                                       |
| 8     | 42.571   | 0.41  | Octadecanoic acid, trimethylsilyl ester                                                                                      |
| 9     | 47.506   | 2.04  | 1,2-Benzenedicarboxylic acid, diisooctyl ester                                                                               |
| 10    | 48.265   | 0.77  | Hexadecanoic acid, 2,3-bis[(trimethylsilyl)oxy]propyl ester                                                                  |
| 11    | 49.739   | 1.06  | .alpha.-D-Glucopyranoside, 1,3,4,6-tetrakis-O-(trimethylsilyl)-.beta.-D-fructofuranosyl 2,3,4,6-tetrakis-O-(trimethylsilyl)- |

**Table S6**

| Peak# | Ret.time | Area% | Name                                                          |
|-------|----------|-------|---------------------------------------------------------------|
| 1     | 13.529   | 48.20 | Butanoic acid, 2-[(trimethylsilyl)oxy]-, trimethylsilyl ester |
| 2     | 39.037   | 8.81  | Hexadecanoic acid, trimethylsilyl ester                       |
| 3     | 41.046   | 2.86  | Octadecane, 1-trimethylsilyloxy-                              |
| 4     | 42.023   | 4.97  | 9,12-Octadecadienoic acid (Z,Z)-, trimethylsilyl ester        |
| 5     | 42.560   | 7.20  | Octadecanoic acid, trimethylsilyl este                        |
| 6     | 47.491   | 12.70 | 1,2-Benzenedicarboxylic acid, diisooctyl ester                |
| 7     | 48.255   | 7.68  | Hexadecanoic acid, 2,3-bis[(trimethylsilyl)oxy] propyl ester  |
| 8     | 51.036   | 7.58  | Octadecanoic acid, 2,3-bis[(trimethylsilyl)oxy]propyl ester   |

## **Supporting File Captions**

Fig. S1. Total viable count of bacteria treated with WE against A: *Pseudomonas aeruginosa*; B: *Streptococcus mutans*.

Fig S2. Optimization of probe ultrasonication conditions on the inhibition of *S.mutans* using M3 extracts

Table S1. GC-MS spectra of WE diluted in ethanol.

Table S2 GC-MS spectra of WEBS diluted in ethanol

Table S3 GC-MS spectra of WEPUS diluted in ethanol

Table S4. GC-MS spectra of WE diluted in chloroform.

Table S5. GC-MS spectra of WEBS diluted in chloroform.

Table S6. GC-MS spectra of WEPUS diluted in chloroform
